# Supplementary material for: “Chocolate” Gold Nanoparticles—One Pot Synthesis and Biocompatibility
Source: PubMed Central journal article supplement (PMC6071287; doi:10.3390/nano8070496), 2018-07-05
Supplement: nanomaterials-08-00496-s001.pdf [file nanomaterials-08-00496-s001.pdf]

# SUPPORTING INFORMATION

## “Chocolate” gold nanoparticles – synthesis and applications

Neelika Roy Chowdhury <sup>1</sup>, Allison J Cowin <sup>2</sup>, Peter Zilm <sup>3</sup> and Krasimir Vasilev <sup>1,2\*</sup>

<sup>1</sup> School of Engineering, University of South Australia, Mawson Lakes–SA 5095

<sup>2</sup> Future Industries Institute, University of South Australia, Mawson Lakes–SA 5095

<sup>3</sup> Microbiology laboratory, The School of Dentistry, The University of Adelaide, Adelaide–SA 5005

\*Corresponding author email address: Krasimir.vasilev@unisa.edu.au

Email addresses:

neelika.roy\_chowdhury@mymail.unisa.edu.au

Allison.Cowin@unisa.edu.au

peter.zilm@adelaide.edu.au

Krasimir.Vasilev@unisa.edu.au

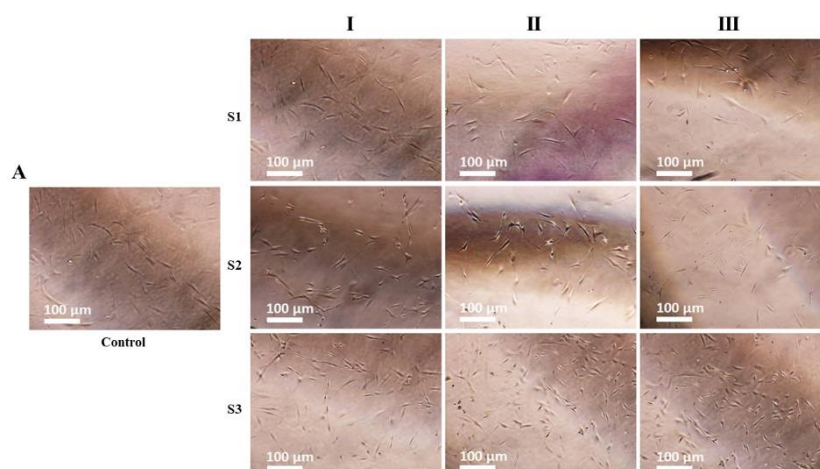

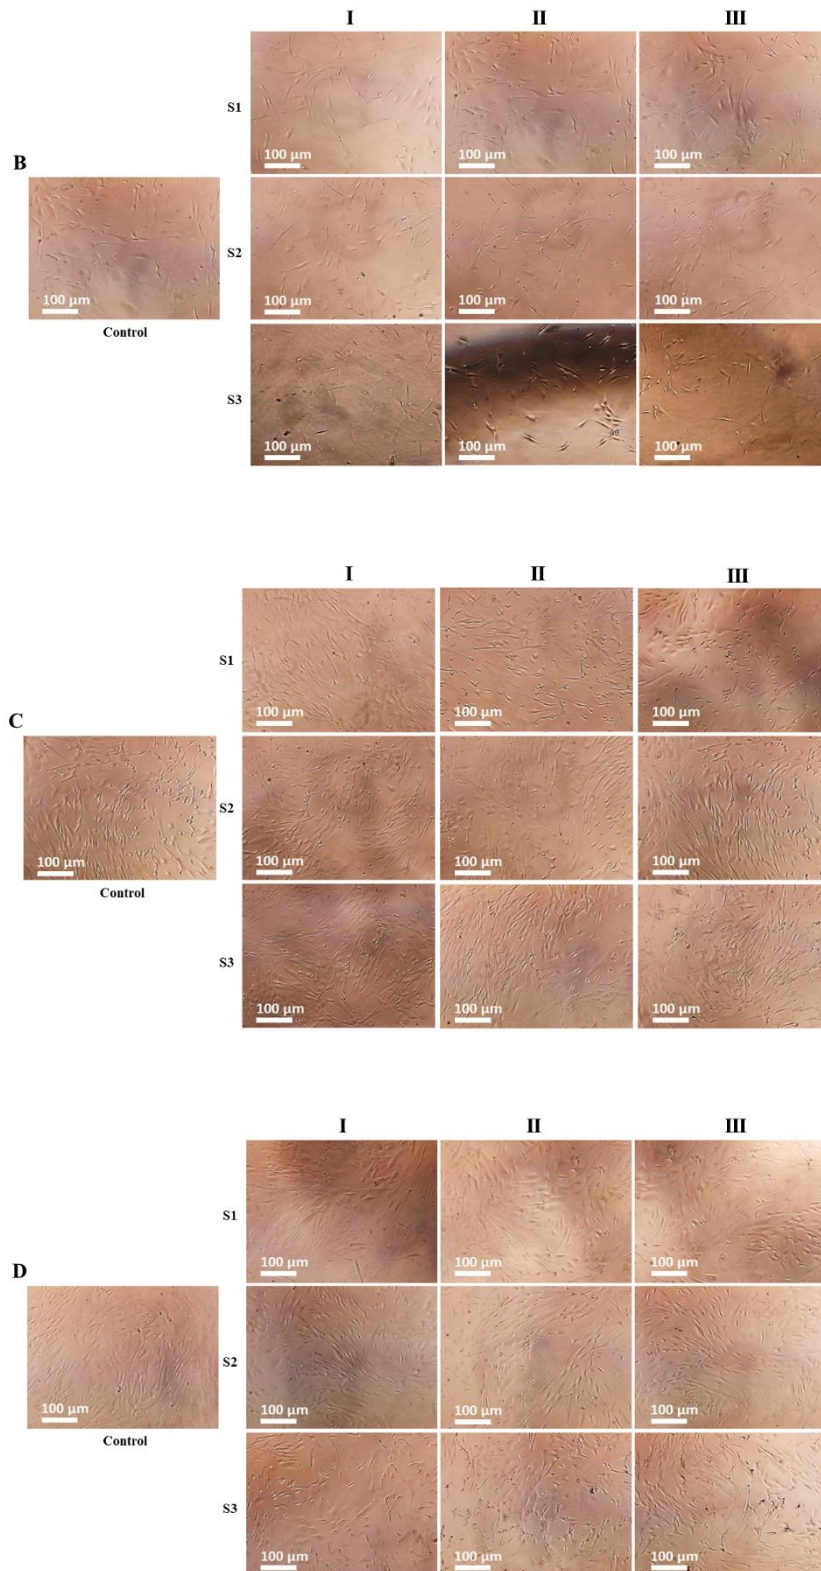

**Figure S1.** Optical micrographs of HDFs cells exposed to different concentrations of cacao-AuNPs and the untreated controls. Panel I, panel II and panel III denote the Au concentrations of 125, 250 and 500 µg/ml. (A) and (B) represent 50% confluent cells exposed to S1, S2 and S3 for 24 h and 72 h respectively. 80% confluent HDFs incubated with AuNPs for 24 h (C) and 72 h (D).

**Table S1.** DF (The degrees of freedom) and P (probability) values obtained from cell viability assay.

| Treatments and exposure time           |                    |         | DF value                         | P value | Adjusted P value |
|----------------------------------------|--------------------|---------|----------------------------------|---------|------------------|
| 50% confluent HDFs<br>exposed for 24 h | 125 µg/ml<br>of Au | C vs S1 | 9 (Treatment<br>between columns) | <0.001  | 0.0003           |
|                                        |                    | C vs S2 |                                  | ns      | 0.1589           |
|                                        |                    | C vs S3 |                                  | <0.0001 | <0.0001          |
|                                        | 250 µg/ml<br>of Au | C vs S1 | 9 (Treatment<br>between columns) | ns      | 0.4513           |
|                                        |                    | C vs S2 |                                  | ns      | 0.0734           |
|                                        |                    | C vs S3 |                                  | <0.0001 | <0.0001          |
|                                        | 500 µg/ml<br>of Au | C vs S1 | 9 (Treatment<br>between columns) | ns      | 0.2300           |
|                                        |                    | C vs S2 |                                  | <0.001  | 0.0001           |
|                                        |                    | C vs S3 |                                  | <0.0001 | <0.0001          |
| 50% confluent HDFs<br>exposed for 72 h | 125 µg/ml<br>of Au | C vs S1 | 9 (Treatment<br>between columns) | ns      | 0.6048           |
|                                        |                    | C vs S2 |                                  | ns      | 0.9968           |
|                                        |                    | C vs S3 |                                  | ns      | 0.9996           |
|                                        | 250 µg/ml<br>of Au | C vs S1 | 9 (Treatment<br>between columns) | ns      | 0.9996           |
|                                        |                    | C vs S2 |                                  | ns      | 0.9999           |
|                                        |                    | C vs S3 |                                  | <0.01   | 0.0039           |
|                                        | 500 µg/ml<br>of Au | C vs S1 | 9 (Treatment<br>between columns) | ns      | 0.9997           |
|                                        |                    | C vs S2 |                                  | ns      | 0.9996           |
|                                        |                    | C vs S3 |                                  | <0.01   | 0.0024           |
| 80% confluent HDFs<br>exposed for 24 h | 125 µg/ml<br>of Au | C vs S1 | 9 (Treatment<br>between columns) | ns      | 0.9735           |
|                                        |                    | C vs S2 |                                  | <0.0001 | <0.0001          |
|                                        |                    | C vs S3 |                                  | <0.0001 | <0.0001          |
|                                        | 250 µg/ml<br>of Au | C vs S1 | 9 (Treatment<br>between columns) | ns      | 0.9994           |
|                                        |                    | C vs S2 |                                  | <0.05   | <0.0280          |
|                                        |                    | C vs S3 |                                  | <0.0001 | <0.0001          |
|                                        | 500 µg/ml<br>of Au | C vs S1 | 9 (Treatment<br>between columns) | ns      | >0.9999          |
|                                        |                    | C vs S2 |                                  | <0.0001 | <0.0001          |
|                                        |                    | C vs S3 |                                  | <0.0001 | <0.0001          |
| 80% confluent HDFs<br>exposed for 72 h | 125 µg/ml<br>of Au | C vs S1 | 9 (Treatment<br>between columns) | ns      | 0.9759           |
|                                        |                    | C vs S2 |                                  | ns      | 0.9996           |
|                                        |                    | C vs S3 |                                  | ns      | 0.2457           |
|                                        | 250 µg/ml<br>of Au | C vs S1 | 9 (Treatment<br>between columns) | ns      | 0.9348           |
|                                        |                    | C vs S2 |                                  | ns      | 0.2850           |
|                                        |                    | C vs S3 |                                  | ns      | 0.2110           |
|                                        | 500 µg/ml<br>of Au | C vs S1 | 9 (Treatment<br>between columns) | ns      | 0.8420           |
|                                        |                    | C vs S2 |                                  | ns      | 0.9994           |
|                                        |                    | C vs S3 |                                  | ns      | 0.6855           |
